# Supplementary material for: The Metabolomic Profile in Amyotrophic Lateral Sclerosis Changes According to the Progression of the Disease: An Exploratory Study
Source: MDPI journal article supplement (doi:10.3390/metabo12090837), 2022-09-04
Supplement: s1 [file s1]

# The metabolomic profile in amyotrophic lateral sclerosis changes according to the progression of the disease: a pilot study.

*Carmen Marino<sup>1,2,‡</sup>, Manuela Grimaldi<sup>2,‡</sup>, Eduardo Sommella<sup>2</sup>, Tania Ciaglia<sup>2</sup>, Angelo Santoro<sup>2</sup>, Michela Buonocore<sup>2</sup>, Emanuela Salviati<sup>2</sup>, Francesca Trojsi<sup>3</sup>, Arianna Polverino<sup>4</sup>, Pierpaolo Sorrentino<sup>5,6</sup>, Giuseppe Sorrentino<sup>4,5,7</sup>, Pietro Campiglia<sup>2</sup> and Anna Maria D'Ursi<sup>2,\*</sup>*

1 Department of Pharmacy and PhD Program in Drug Discovery and Development, University of Salerno, via Giovanni Paolo II, 132, 84084 Fisciano, Salerno, Italy

2 Department of Pharmacy, University of Salerno, via Giovanni Paolo II, 132, 84084 Fisciano, Salerno, Italy

3 Department of Advanced Medical and Surgical Sciences, University of Campania Luigi Vanvitelli. Caserta, Via Maggiore Salvatore Arena, 81100 Contrada San Benedetto, Italy

4 Institute of Diagnosis and Treatment Hermitage Capodimonte, Naples, Cupa delle Tozzole, 2, 80131, Italy.

5 Institute of Applied Sciences and Intelligent Systems of National Research Council, Pozzuoli, Via Campi Flegrei 34, 8007, Italy

6 Department of Engineering, University of Naples "Parthenope", Via Ammiraglio Ferdinando Acton, 38, 80133, Naples, Italy

7 Department of Motor and Wellness Sciences, University of Naples "Parthenope", Via Ammiraglio Ferdinando Acton, 38, 80133, Naples, Italy

\* Correspondence: dursi@unisa.it

†The first two authors contributed equally.

## Table of content:

**-Table S1** Metabolites resulted from serum ALS patients using NMR spectroscopy and HRMS.

**-Table S2** Validation of the multivariate PLS-DA model using LOOCV and 10-Fold related to NMR and HRMS analysis on serum extract of *early* and *advanced* ALS patients.

**-Table S3.** Validation of the multivariate O-PLS-DA model related to NMR spectroscopy and HRMS analysis on early and advanced ALS patients' serum extracts.

**- Table S4.** ROC curve biomarkers related to ALS early and *advanced* patients' serum polar extract by NMR analysis. Discriminating metabolites have been classified by AUC (Area under the curve) >70 and p-value < 0.05, p-value adjustment using Bonferroni.

- **Table S5.** ROC curve biomarkers related to ALS *early* and *advanced* patients' serum polar and apolar extract by HRMS analysis. Discriminating metabolites have been classified by  $AUC > 0.70$  and  $p\text{-value} < 0.05$ ,  $p\text{-value}$  adjustment using Bonferroni.

- **Table S6.** Correlation analysis between the clinical parameter ECAS and ALS patients serum metabolites detected by NMR and HRMS. The table shows the correlation coefficient calculated by Person distance and the univariate statistical validation carried out by T-Test,  $p\text{-value}$ , and False discovery rate (FDR). Metabolites with  $p\text{-value} < 0.05$ , correlation index  $\geq \pm 70$ , and  $FDR < 1$  are considered to correlate with ECAS parameter.

**Table S7.** Correlation analysis between the clinical parameter ALSFR-S and ALS patients' serum metabolites detected by NMR and HRMS. The table shows the correlation coefficient calculated by Person distance and the univariate statistical validation carried out by T-Test,  $p\text{-value}$ , and False discovery rate (FDR). Metabolites with  $p\text{-value} < 0.05$ , correlation index  $\geq \pm 70$ , and  $FDR < 1$  are considered correlating with ALSFR-S parameter.

- **Table S8.** Validation of the multivariate O-PLS-DA model related to NMR spectroscopy and HRMS analysis on serum extracts of *early* and *advanced* male ALS patients.

- **Figure S1.** 1D-NOESY  $^1\text{H}$  nuclear magnetic resonance spectra of human sera samples from: early ALS patients (blue) and advanced ALS patient (red). The spectra are acquired at 600 MHz and  $T = 310\text{ K}$ .

- **Figure S2.** PLS-DA score plot for serum polar(A1-B1) and lipid extracts (C1-D1) obtained by mass spectrometry and serum polar extracts obtained by  $^1\text{H}$ -NMR spectroscopy (E1-F1). The dataset used corresponds to the *early* (A1-C1-E1) and *advanced* subset (B1-D1-F1). Histograms (A2-F2) are related to cross-validation indices  $R^2$ ,  $Q^2$ , and accuracy.

- **Figure S3.** Sample prediction area plot carried out using Maximum distance (a,b,c) and Mahalanobis (e,f,g) showing the distribution of samples in validation area.

- **Figure S4.** PCA and PLS-DA score plot (A-D) for  $^1\text{H}$  NMR data collected in 1D-NOESY spectra acquired at 600 MHz. Data represent the sera from 9 ALS *early* patients (green) and 6 ALS *advanced* patients (red). PCA and PLS-DA score scatter plot for the HRMS data collected acquired in ESI(+) and (-). Data are relative to polar and (B-E) and apolar (C-F) serum extract of 9 ALS *early* patients (green) compared to 6 *advanced* patients (red).

- **Figure S5.** ROC curve of biomarker identified using polar serum extract by NMR spectroscopy. The sensitivity is on the y-axis, and the specificity is on the x-axis. The AUC is in blue.

- **Figure S6.** ROC curve of biomarker identified using serum apolar extract by HRMS spectroscopy. The sensitivity is on the y-axis, and the specificity is on the x-axis. The AUC is in blue.

- **Figure S7.** ROC curve of biomarker identified on serum polar extract by HRMS spectroscopy. The sensitivity is on the y-axis, and the specificity is on the x-axis. The AUC is in blue.

- **Figure S8.** OPLS-DA score plot and VIP graph (A-D) for  $^1\text{H}$  NMR data collected in 1D-NOESY spectra acquired at 600 MHz. Data represent the sera from 6 male ALS *early* patients (green) and 4 male ALS *advanced* patients (red). O-PLS-DA score scatter plot and VIP graph for the HRMS

data acquired in ESI(+) and (-). Data are relative to polar and (B-E) and apolar (C-F) serum extract of 6 male ALS *early* patients (green) compared to 4 *advanced* male patients (red).

**Table S1** Metabolites resulted from serum ALS patients using NMR and HRMS spectroscopy analysis.

| NMR spectroscopy      | HRMS polar extract                         | HRMS apolar extract  |                        |
|-----------------------|--------------------------------------------|----------------------|------------------------|
| 1-Methylhistidine     | 3-(3,4,5-Trimethoxyphenyl) propanoic acid  | LPC(18:1)/PC(O-18:1) | PC(O-36:2)/PE(P-39:1)  |
| 2-Hydroxybutyrate     | 3-Methyl-2-oxovaleric acid                 | 3-Deoxyvitamin D3    | PC(O-36:3)             |
| Acetic acid           | 4-Hydroxyestrone sulfate                   | CAR 11:0             | PC(O-36:4)             |
| Betaine               | 5-Acetylamino-6-formylamino-3-methyluracil | CE (19:0)            | PC(O-36:5)             |
| Acetoacetate          | 9-Decenoylcarnitine                        | CE(16:0)             | PC(O-38:4)             |
| L-Carnitine           | Androsterone sulfate                       | CE(16:1)             | PC(O-38:5)             |
| Creatine              | Betaine                                    | CE(18:1)             | PC(O-38:6)             |
| Citric acid           | Citric acid                                | CE(18:2)             | PC(O-40:5)             |
| Choline               | Creatine                                   | CE(18:3)             | PC(O-40:6)             |
| D-Glucose             | Creatinine                                 | CE(20:3)             | PC(O-44:5)             |
| Glycine               | Decanoylcarnitine                          | CE(20:4)             | PC(P-40:6)             |
| Formic acid           | Dehydroepiandrosterone sulfate             | Cer 42:0;O3          | PE(O-38:5)             |
| Methionine            | D-Glucose                                  | Cer 42:1;O2          | PI(27:1)               |
| Hypoxanthine          | L-Fucose                                   | FA 22:1;O2           | PI(29:1)               |
| L-Tyrosine            | L-Acetylcarnitine                          | FA 26:5;O2           | PI(38:4)               |
| L-Phenylalanine       | L-Arginine                                 | LPC(16:1)            | SM 32:1;O2/EPC 35:1;O2 |
| L-Alanine             | L-Carnitine                                | LPC(18:2)            | SM 34:1;O2/EPC 37:1;O2 |
| L-Proline             | Indoxyl sulfate                            | LPC(20:4)            | SM 34:2;O2/EPC 37:2;O2 |
| L-Threonine           | L-Glutamine                                | MG(18:0)             | SM 35:1;O2/EPC 38:1;O2 |
| L-Asparagine          | L-Histidine                                | PC(30:0)/PE(33:0)    | SM 36:0;O2             |
| L-Isoleucine          | Linoleic acid                              | PC(32:0)/PE(35:0)    | SM 36:2;O2/EPC 39:2;O2 |
| L-Histidine           | p-Cresol sulfate                           | PC(32:1)/PE(35:1)    | SM 38:1;O2             |
| Lysine                | L-isoleucyl-L-proline                      | PC(32:2)/PE(35:2)    | SM 38:2;O2             |
| L-Serine              | L-Lysine                                   | PC(33:1)/PE(36:1)    | SM 40:1;O2             |
| L-Lactic acid         | L-Methionine                               | PC(34:1)/PE(37:1)    | SM 40:2;O2             |
| L-Aspartic acid       | L-Octanoylcarnitine                        | PC(34:2)/PE(37:2)    | SM 41:1;O2             |
| Ornithine             | LPC(16:0)                                  | PC(35:1)/PE(38:1)    | SM 41:2;O2             |
| Pyruvic acid          | LPC(16:1)                                  | PC(35:2)/PE(38:2)    | SM 42:1;O2             |
| Succinic acid         | LPC(18:0)                                  | PC(35:3)/PE(38:3)    | SM 42:2;O2             |
| 3-Hydroxybutyric acid | LPC(18:1)                                  | PC(35:4)/PE(38:4)    | SM 42:3;O2             |
| L-Arginine            | LPC(18:2)                                  | PC(36:1)/PE(39:1)    | ST 24:2;O4             |
| Creatinine            | LPC(20:3)                                  | PC(36:2)/PE(39:2)    | TG(50:1)               |
| L-Glutamine           | L-Phenylalanine                            | PC(36:3)/PE(39:3)    | TG(48:1)               |
| L-Leucine             | L-Proline                                  | PC(36:4)/PE(39:4)    | TG(48:2)               |
| Malonic acid          | L-Tryptophan                               | PC(37:4)/PE(40:4)    | TG(50:2)               |
| L-Glutamic acid       | L-Tyrosine                                 | PC(38:2)/PE(41:2)    | TG(50:3)               |
| L-Valine              | Oleic acid                                 | PC(38:3)/PE(41:3)    | TG(50:4)               |
| L-Tryptophan          | Palmitoleic acid                           | PC(38:4)/PE(41:4)    | TG(51:2)               |
| Acetone               | Paraxanthine                               | PC(38:5)/PE(41:5)    | TG(52:2)               |
| Isobutyric acid       | PC(34:1)                                   | PC(38:6)/PE(41:6)    | TG(52:3)               |
|                       | PC(34:2)                                   | PC(40:4)/PE(43:4)    | TG(52:4)               |
|                       | PC(36:2)                                   | PC(40:5)             | TG(52:5)               |
|                       | PC(36:3)                                   | PC(40:6)/PE(43:6)    | TG(54:4)               |
|                       | L-Isoleucine                               | PC(O-16:0)/LPE(19:0) | TG(54:5)               |

|  |                                                                         |                                                                                                 |                                                                           |
|--|-------------------------------------------------------------------------|-------------------------------------------------------------------------------------------------|---------------------------------------------------------------------------|
|  | Phenylalanylphenylalanine<br>SM(34:1)<br>Stearoylcarnitine<br>Uric acid | PC(O-18:0)/LPC(18:0)<br>PC(O-32:1)/PE(O-35:1)<br>PC(O-34:1)/PE(O-37:1)<br>PC(O-34:2)/PE(O-37:2) | TG(56:6)<br>TG(63:4)<br>TG(63:7)<br>TG(66:10)<br>9Z,12Z-octadecadienamide |
|--|-------------------------------------------------------------------------|-------------------------------------------------------------------------------------------------|---------------------------------------------------------------------------|

**Table S2** Validation of the multivariate PLS-DA model using LOOCV and 10-Fold-CV related to NMR and HRMS analysis on serum extract of *early* and *advanced* ALS patients.

| PLS-DA cross-validation related to polar extract using NMR spectroscopy |         |         |         |         |         |
|-------------------------------------------------------------------------|---------|---------|---------|---------|---------|
| Measure using LOOCV                                                     | 1 comps | 2 comps | 3 comps | 4 comps | 5 comps |
| Accuracy                                                                | 0.67    | 0.87    | 1.0     | 1.0     | 1.0     |
| R2                                                                      | 0.58    | 0.85    | 0.94    | 0.97    | 0.98    |
| Q2                                                                      | 0.33    | 0.61    | 0.81    | 0.92    | 0.95    |
| Measure using 10 Fold-CV                                                | 1 comps | 2 comps | 3 comps | 4 comps | 5 comps |
| Accuracy                                                                | 0.71    | 0.89    | 1.0     | 1.0     | 1.0     |
| R2                                                                      | 0.59    | 0.85    | 0.94    | 0.97    | 0.98    |
| Q2                                                                      | 0.30    | 0.59    | 0.78    | 0.87    | 0.88    |
| PLS-DA cross-validation related to polar extract using HRMS             |         |         |         |         |         |
| Measure using LOOCV                                                     | 1 comps | 2 comps | 3 comps | 4 comps | 5 comps |
| Accuracy                                                                | 0.75    | 0.86    | 1.0     | 1.0     | 1.0     |
| R2                                                                      | 0.36    | 0.73    | 0.91    | 0.98    | 0.99    |
| Q2                                                                      | 0.18    | 0.53    | 0.82    | 0.94    | 0.98    |
| Measure using 10 Fold-CV                                                | 1 comps | 2 comps | 3 comps | 4 comps | 5 comps |
| Accuracy                                                                | 0.79    | 0.88    | 1.0     | 1.0     | 1.0     |
| R2                                                                      | 0.36    | 0.73    | 0.91    | 0.98    | 0.99    |
| Q2                                                                      | 0.22    | 0.60    | 0.85    | 0.95    | 0.98    |

PLS-DA cross-validation related to apolar extract using HRMS

| Measure using LOOCV      | 1 comps | 2 comps | 3 comps | 4 comps | 5 comps |
|--------------------------|---------|---------|---------|---------|---------|
| Accuracy                 | 0.86    | 1.0     | 1.0     | 1.0     | 1.0     |
| R2                       | 0.82    | 0.93    | 0.97    | 0.99    | 0.99    |
| Q2                       | 0.59    | 0.81    | 0.91    | 0.97    | 0.99    |
| Measure using 10 Fold-CV | 1 comps | 2 comps | 3 comps | 4 comps | 5 comps |
| Accuracy                 | 0.88    | 1.0     | 1.0     | 1.0     | 1.0     |
| R2                       | 0.82    | 0.93    | 0.97    | 0.99    | 0.99    |
| Q2                       | 0.55    | 0.84    | 0.93    | 0.97    | 0.99    |

**Table S3.** Validation of the multivariate O-PLS-DA model related to NMR spectroscopy and HRMS analysis on *early* and *advanced* ALS patient's serum extracts.

| NMR SPECTROSCOPY            |        |        |        |        |
|-----------------------------|--------|--------|--------|--------|
|                             | p1     | o1     | o2     | o3     |
| R2X                         | 0.0736 | 0.223  | 0.121  | 0.119  |
| R2Y                         | 0.685  | 0.18   | 0.0724 | 0.0241 |
| Q2                          | 0.501  | 0.216  | 0.145  | 0.0593 |
| HRMS SPECTROSCOPY           |        |        |        |        |
| <i>Polar serum extract</i>  |        |        |        |        |
|                             | p1     | o1     | o2     | o3     |
| R2X                         | 0.108  | 0.207  | 0.166  | 0.088  |
| R2Y                         | 0.855  | 0.0843 | 0.0412 | 0.0109 |
| Q2                          | 0.646  | 0.25   | 0.0686 | 0.0151 |
| <i>Apolar serum extract</i> |        |        |        |        |
|                             | p1     | o1     | o2     | o3     |
| R2X                         | 0.061  | 0.238  | 0.181  | 0.0861 |
| R2Y                         | 0.56   | 0.342  | 0.0568 | 0.0253 |
| Q2                          | 0.295  | 0.449  | 0.144  | 0.0635 |

**Table S4.** ROC curve biomarkers related to ALS early and *advanced* patients' serum polar extract by NMR analysis. Discriminating metabolites have been classified by AUC >70 and p-value < 0.05, p-value adjustment using Bonferroni.

| NMR polar extract     | AUC  | p-value | Bonferroni | ADVANCED | EARLY |
|-----------------------|------|---------|------------|----------|-------|
| Acetic acid           | 0.85 | 0.0061  | 0.000153   | ↑        | ↓     |
| 3-Hydroxybutyric acid | 0.83 | 0.00082 | 2.05E-05   | ↑        | ↓     |
| Acetone               | 0.77 | 0.016   | 0.0004     | ↑        | ↓     |
| L-Glutamine           | 0.76 | 0.029   | 0.000725   | ↓        | ↑     |

**Table S5.** ROC curve biomarkers related to ALS *early* and *advanced* patients' serum polar and apolar extract by HRMS analysis. Discriminating metabolites have been classified by AUC >70 and p-value < 0.05, p-value adjustment using Bonferroni.

| <b>HRMS polar extract</b>               | <b>AUC</b> | <b>p-value</b> | <b>Bonferroni</b> | <b>ADVANCED</b> | <b>EARLY</b> |
|-----------------------------------------|------------|----------------|-------------------|-----------------|--------------|
| Citric acid                             | 0.94       | 0.0000000169   | 1.74227E-10       | ↑               | ↓            |
| L-Fucose                                | 0.83       | 0.0015         | 1.54639E-05       | ↓               | ↑            |
| 3-(3-45-Trimethoxyphenyl)propanoic acid | 0.80       | 0.0041         | 4.2268E-05        | ↓               | ↑            |
| Oleic acid                              | 0.80       | 0.012          | 0.000123711       | ↑               | ↓            |
| SM(34:1)                                | 0.80       | 0.0017         | 1.75258E-05       | ↑               | ↓            |
| 9-Decenoylcarnitine                     | 0.77       | 0.0067         | 6.90722E-05       | ↑               | ↓            |
| PC(34:2)                                | 0.77       | 0.03           | 0.000309278       | ↑               | ↓            |
| PC(36:2)                                | 0.77       | 0.018          | 0.000185567       | ↑               | ↓            |
| LPC(18:2)                               | 0.76       | 0.0058         | 5.97938E-05       | ↑               | ↓            |
| <b>HRMS apolar extract</b>              | <b>AUC</b> | <b>p-value</b> | <b>Bonferroni</b> | <b>ADVANCED</b> | <b>EARLY</b> |
| SM 41:1;O2                              | 0.86       | 1.30E-08       | 2.70833E-10       | ↓               | ↑            |
| PC 36:1                                 | 0.85       | 0.00019        | 3.95833E-06       | ↓               | ↑            |
| Cer 42:0;O3                             | 0.80       | 9.29E-09       | 1.93542E-10       | ↓               | ↑            |
| Oleamide                                | 0.79       | 4.20E-09       | 8.75E-11          | ↓               | ↑            |
| SM 40:1;O2                              | 0.75       | 0.015          | 0.0003125         | ↓               | ↑            |
| SM 38:1;O2                              | 0.75       | 0.0011         | 2.29167E-05       | ↓               | ↑            |
| CE 18:1                                 | 0.74       | 0.0027         | 0.00005625        | ↑               | ↓            |
| Linoleamide                             | 0.74       | 0.00022        | 4.58333E-06       | ↓               | ↑            |
| TG(52:2)                                | 0.73       | 0.018          | 0.000375          | ↓               | ↑            |
| PC 38:3                                 | 0.73       | 0.0038         | 7.91667E-05       | ↑               | ↓            |
| SM 41:2;O2                              | 0.72       | 0.0014         | 2.91667E-05       | ↓               | ↑            |

**Table S6.** Correlation analysis between the clinical parameter ECAS and ALS patients' serum metabolites detected by NMR and HRMS. The table shows the correlation coefficient (corr.value) calculated by Person distance and the univariate statistical validation carried out using p-value and False discovery rate (FDR). Metabolites with p-value <0.05, correlation index  $\geq \pm 70$ , and FDR <1 are considered correlating with ECAS parameter.

| ECAS/NMR metabolites correlation | corr.value | p-value    | FDR        |
|----------------------------------|------------|------------|------------|
| 1-Methylhistidine                | 0.81553    | 4,03E-04   | 5,64E-03   |
| L-Tyrosine                       | 0.79862    | 1,23E-03   | 1,29E-02   |
| L-Histidine                      | -0.70498   | 1,36E-01   | 0.00011452 |
| L-Carnitine                      | 0.69078    | 2,38E-01   | 0.00016693 |
| L-Glutamine                      | 0.68096    | 3,45E-01   | 0.00020685 |
| L-Alanine                        | 0.64858    | 0.00010606 | 0.00054681 |
| Acetoacetate                     | 0.64551    | 0.00011717 | 0.00054681 |
| Betaine                          | 0.62283    | 0.0002371  | 0.00099581 |
| L-Arginine                       | 0.58847    | 0.00062501 | 0.0023864  |
| L-Valine                         | 0.57445    | 0.00090067 | 0.0031523  |
| L-Asparagine                     | -0.55287   | 0.0015326  | 0.0049514  |
| Lysine                           | 0.54457    | 0.0018626  | 0.0055877  |
| L-Phenylalanine                  | 0.53106    | 0.002532   | 0.0067928  |
| L-Glutamic acid                  | 0.53008    | 0.0025877  | 0.0067928  |
| Citric acid                      | 0.52225    | 0.0030727  | 0.0075913  |
| Pyruvic acid                     | 0.49974    | 0.0049257  | 0.011493   |
| L-Aspartic acid                  | 0.49027    | 0.0059522  | 0.013158   |
| Hypoxanthine                     | 0.4574     | 0.011043   | 0.02319    |
| L-Isoleucine                     | -0.4333    | 0.016761   | 0.033523   |
| Glycine                          | 0.42051    | 0.020677   | 0.038745   |
| 3-Hydroxybutyric acid            | -0.41891   | 0.021218   | 0.038745   |
| Succinic acid                    | -0.39702   | 0.029828   | 0.051093   |
| Creatinine                       | 0.39573    | 0.030413   | 0.051093   |
| Formic acid                      | 0.38844    | 0.033901   | 0.054764   |
| L-Threonine                      | 0.35138    | 0.056904   | 0.088518   |
| Acetone                          | 0.32942    | 0.07546    | 0.11319    |
| D-Glucose                        | -0.29875   | 0.10878    | 0.15755    |
| L-Proline                        | 0.27714    | 0.13816    | 0.19342    |
| L-Leucine                        | 0.26769    | 0.15267    | 0.20451    |
| Acetic acid                      | 0.26573    | 0.15582    | 0.20451    |
| L-Lactic acid                    | -0.23562   | 0.21004    | 0.26732    |
| L-Serine                         | -0.20559   | 0.27575    | 0.34063    |
| Malonic acid                     | -0.13932   | 0.46279    | 0.55535    |
| Isobutyric acid                  | 0.12223    | 0.51994    | 0.60659    |
| 2-Hydroxybutyrate                | -0.11781   | 0.53525    | 0.60758    |
| Creatine                         | 0.11122    | 0.55845    | 0.61724    |
| Methionine                       | 0.098429   | 0.60483    | 0.65135    |
| L-Tryptophan                     | 0.079341   | 0.67685    | 0.69646    |
| Choline                          | 0.078557   | 0.67988    | 0.69646    |

|                                                |                   |                |            |
|------------------------------------------------|-------------------|----------------|------------|
| Ornithine                                      | 0.036914          | 0.84644        | 0.84644    |
| <b>ECAS/HRMS polar-metabolites correlation</b> | <b>corr.value</b> | <b>p-value</b> | <b>FDR</b> |
| Creatine                                       | 0.50643           | 0.0042952      | 0.071586   |
| LPC(20:3)                                      | 0.39038           | 0.032943       | 0.30325    |
| L-Arginine                                     | 0.38939           | 0.033426       | 0.30325    |
| Uric acid                                      | -0.37894          | 0.038918       | 0.30325    |
| 3-Methyl-2-oxovaleric acid                     | -0.36255          | 0.04896        | 0.30325    |
| PC(36:3)                                       | -0.36217          | 0.049215       | 0.30325    |
| L-Isoleucine                                   | -0.35435          | 0.054701       | 0.30325    |
| 5-Acetylamino-6-formylamino-3-methyluracil     | 0.34474           | 0.06209        | 0.30325    |
| L-isoleucyl-L-proline                          | -0.33918          | 0.066716       | 0.30325    |
| Indoxyl sulfate                                | -0.321            | 0.083705       | 0.34877    |
| PC(34:1)                                       | 0.30915           | 0.096445       | 0.37094    |
| 3-(3-4-5-Trimethoxyphenyl)propanoic acid       | 0.30017           | 0.10704        | 0.38228    |
| L-Tryptophan                                   | 0.27287           | 0.14459        | 0.44715    |
| p-Cresol sulfate                               | 0.26502           | 0.15696        | 0.44715    |
| Creatinine                                     | -0.26292          | 0.1604         | 0.44715    |
| L-Carnitine                                    | -0.26257          | 0.16097        | 0.44715    |
| PC(36:2)                                       | -0.24119          | 0.19916        | 0.51908    |
| LPC(16:0)                                      | 0.23255           | 0.21622        | 0.51908    |
| Dehydroepiandrosterone sulfate                 | -0.23167          | 0.21801        | 0.51908    |
| L-Proline                                      | 0.22454           | 0.2329         | 0.52931    |
| Decanoylcarnitine                              | 0.20902           | 0.26765        | 0.58185    |
| Linoleic acid                                  | -0.19865          | 0.29263        | 0.59681    |
| LPC(16:1)                                      | 0.19355           | 0.30544        | 0.59681    |
| L-Fucose                                       | 0.19164           | 0.31034        | 0.59681    |
| Oleic acid                                     | -0.17844          | 0.34545        | 0.63973    |
| LPC(18:1)                                      | 0.16101           | 0.39534        | 0.70597    |
| L-Acetylcarnitine                              | -0.13345          | 0.48203        | 0.77038    |
| Paraxanthine                                   | -0.13319          | 0.4829         | 0.77038    |
| L-Octanoylcarnitine                            | 0.13194           | 0.48706        | 0.77038    |
| L-Phenylalanine                                | 0.13015           | 0.49304        | 0.77038    |
| L-Methionine                                   | 0.12236           | 0.51947        | 0.78249    |
| Palmitoleic acid                               | -0.11872          | 0.53209        | 0.78249    |
| L-Histidine                                    | 0.10728           | 0.57258        | 0.81797    |
| L-Tyrosine                                     | 0.095787          | 0.6146         | 0.84315    |
| L-Glutamine                                    | 0.087953          | 0.64396        | 0.84315    |
| Phenylalanylphenylalanine                      | -0.087277         | 0.64652        | 0.84315    |
| LPC(18:2)                                      | 0.084346          | 0.65766        | 0.84315    |
| 4-Hydroxyestrone sulfate                       | -0.067635         | 0.7225         | 0.90313    |
| SM(34:1)                                       | 0.056344          | 0.76743        | 0.9359     |
| LPC(18:0)                                      | -0.040053         | 0.83356        | 0.93884    |
| Stearoylcarnitine                              | 0.038924          | 0.83819        | 0.93884    |
| Androsterone sulfate                           | -0.037514         | 0.84398        | 0.93884    |
| Citric acid                                    | -0.037276         | 0.84496        | 0.93884    |
| PC(34:2)                                       | -0.020171         | 0.91575        | 0.98612    |
| Betaine                                        | 0.0099735         | 0.95828        | 0.98612    |
| D-Glucose                                      | -0.0073776        | 0.96914        | 0.98612    |
| L-Lysine                                       | -0.0042401        | 0.98226        | 0.98612    |



|                                                 |                   |                |            |
|-------------------------------------------------|-------------------|----------------|------------|
| 9-Decenoylcarnitine                             | -0.0033163        | 0.98612        | 0.98612    |
| <b>ECAS/HRMS apolar-metabolites correlation</b> | <b>corr.value</b> | <b>p-value</b> | <b>FDR</b> |
| PI(29:1)                                        | 0.44006           | 0.014952       | 0.33793    |
| PC(O-32:1)/PE(O-35:1)                           | 0.39702           | 0.029831       | 0.33793    |
| PC(O-16:0)/LPE(19:0)                            | 0.39549           | 0.030525       | 0.33793    |
| PC(P-40:6)                                      | 0.38872           | 0.03376        | 0.33793    |
| PC(30:0)/PE(33:0)                               | 0.38446           | 0.035934       | 0.33793    |
| PC(35:1)/PE(38:1)                               | 0.38271           | 0.036859       | 0.33793    |
| SM 34:1;O2/EPC 37:1;O2                          | 0.37518           | 0.041058       | 0.33793    |
| PC(O-18:0)/LPC(18:0)                            | 0.37461           | 0.04139        | 0.33793    |
| PC(O-44:5)                                      | 0.36716           | 0.045947       | 0.33793    |
| TG(48:2)                                        | 0.36123           | 0.04985        | 0.33793    |
| TG(52:2)                                        | 0.35884           | 0.051491       | 0.33793    |
| TG(48:1)                                        | 0.35703           | 0.052769       | 0.33793    |
| PC(38:3)/PE(41:3)                               | 0.35197           | 0.056466       | 0.33793    |
| PI(27:1)                                        | 0.34464           | 0.062169       | 0.33793    |
| PC(38:5)/PE(41:5)                               | 0.34348           | 0.063115       | 0.33793    |
| LPC(16:1)                                       | -0.33757          | 0.0681         | 0.33793    |
| PC(36:1)/PE(39:1)                               | 0.33517           | 0.070211       | 0.33793    |
| TG(50:4)                                        | 0.3322            | 0.072881       | 0.33793    |
| SM 35:1;O2/EPC 38:1;O2                          | 0.32709           | 0.07768        | 0.33793    |
| PE(O-38:5)                                      | 0.32701           | 0.077756       | 0.33793    |
| TG(54:5)                                        | 0.32541           | 0.079311       | 0.33793    |
| TG(52:3)                                        | 0.31632           | 0.088568       | 0.35527    |
| PC(40:5)                                        | 0.3144            | 0.09063        | 0.35527    |
| TG(50:3)                                        | 0.30916           | 0.096435       | 0.36349    |
| PC(40:4)/PE(43:4)                               | 0.30555           | 0.1006         | 0.36513    |
| PC(O-36:2)/PE(P-39:1)                           | 0.29633           | 0.11183        | 0.3914     |
| PC(38:4)/PE(41:4)                               | 0.2918            | 0.11767        | 0.39764    |
| ST 24:2;O4                                      | 0.28541           | 0.12631        | 0.40491    |
| CE(20:4)                                        | 0.28308           | 0.12957        | 0.40491    |
| PC(O-36:4)                                      | 0.28122           | 0.13221        | 0.40491    |
| CE (19:0)                                       | -0.2773           | 0.13792        | 0.40556    |
| 9Z-12Z-octadecadienamide                        | 0.27424           | 0.14251        | 0.40556    |
| CE(16:0)                                        | -0.2723           | 0.14546        | 0.40556    |
| TG(50:2)                                        | 0.27003           | 0.14898        | 0.40556    |
| PC(O-38:4)                                      | 0.26674           | 0.1542         | 0.40841    |
| PC(34:1)/PE(37:1)                               | 0.26022           | 0.16489        | 0.42269    |
| PC(O-40:5)                                      | 0.25826           | 0.16821        | 0.42269    |
| PC(O-36:3)                                      | 0.2457            | 0.19061        | 0.467      |
| SM 42:3;O2                                      | 0.24195           | 0.1977         | 0.46988    |
| CE(18:1)                                        | -0.24003          | 0.20138        | 0.46988    |
| PC(36:4)/PE(39:4)                               | 0.22672           | 0.22829        | 0.52028    |
| TG(52:5)                                        | 0.21143           | 0.26204        | 0.58364    |

|                        |           |         |         |
|------------------------|-----------|---------|---------|
| PC(O-36:5)             | 0.2088    | 0.26815 | 0.58398 |
| SM 42:1;O2             | 0.2       | 0.28931 | 0.60325 |
| PC(35:2)/PE(38:2)      | -0.19583  | 0.29967 | 0.60867 |
| PC(40:6)/PE(43:6)      | 0.19327   | 0.30617 | 0.60867 |
| SM 40:1;O2             | 0.19156   | 0.31055 | 0.60867 |
| PC(34:2)/PE(37:2)      | -0.18455  | 0.32892 | 0.62564 |
| TG(56:6)               | 0.17962   | 0.34222 | 0.62564 |
| TG(51:2)               | 0.17708   | 0.34921 | 0.62564 |
| PC(37:4)/PE(40:4)      | 0.17523   | 0.35436 | 0.62564 |
| PC(32:2)/PE(35:2)      | -0.17373  | 0.35855 | 0.62564 |
| MG(18:0)               | -0.17354  | 0.35908 | 0.62564 |
| SM 36:0;O2             | -0.16916  | 0.37151 | 0.62564 |
| PC(32:0)/PE(35:0)      | 0.16718   | 0.37723 | 0.62564 |
| PC(35:4)/PE(38:4)      | -0.16095  | 0.39551 | 0.62564 |
| PC(36:2)/PE(39:2)      | 0.15954   | 0.39971 | 0.62564 |
| CE(18:3)               | -0.15936  | 0.40027 | 0.62564 |
| TG(63:7)               | -0.15926  | 0.40056 | 0.62564 |
| CE(16:1)               | 0.15753   | 0.40576 | 0.62564 |
| LPC(18:2)              | 0.1566    | 0.40858 | 0.62564 |
| PC(38:2)/PE(41:2)      | 0.15351   | 0.41799 | 0.62578 |
| PC(38:6)/PE(41:6)      | 0.15239   | 0.42144 | 0.62578 |
| SM 32:1;O2/EPC 35:1;O2 | 0.15027   | 0.42801 | 0.62604 |
| LPC(20:4)              | -0.14388  | 0.44814 | 0.64586 |
| TG(66:10)              | 0.1394    | 0.46253 | 0.65692 |
| SM 38:2;O2             | 0.13242   | 0.48547 | 0.67965 |
| Cer 42:0;O3            | -0.12943  | 0.49544 | 0.68319 |
| CE(18:2)               | -0.1275   | 0.50194 | 0.68319 |
| PC(33:1)/PE(36:1)      | -0.12336  | 0.51604 | 0.69277 |
| PC(35:3)/PE(38:3)      | -0.11599  | 0.54162 | 0.70713 |
| SM 38:1;O2             | 0.11574   | 0.5425  | 0.70713 |
| TG(63:4)               | 0.11208   | 0.5554  | 0.70713 |
| FA 26:5;O2             | -0.11127  | 0.55828 | 0.70713 |
| TG(54:4)               | 0.11      | 0.56282 | 0.70713 |
| SM 40:2;O2             | 0.10417   | 0.58383 | 0.71889 |
| TG(50:1)               | 0.10219   | 0.59104 | 0.71889 |
| CE(20:3)               | 0.10133   | 0.59418 | 0.71889 |
| PC(O-40:6)             | -0.095417 | 0.61598 | 0.73617 |
| 3-Deoxyvitamin D3      | 0.092043  | 0.62856 | 0.73778 |
| PC(36:3)/PE(39:3)      | -0.091024 | 0.63239 | 0.73778 |
| PC(O-38:6)             | -0.079254 | 0.67719 | 0.78076 |
| TG(52:4)               | 0.073682  | 0.69879 | 0.79446 |
| FA 22:1;O2             | 0.07202   | 0.70528 | 0.79446 |
| SM 34:2;O2/EPC 37:2;O2 | 0.062699  | 0.74204 | 0.82637 |
| PC(O-38:5)             | 0.059382  | 0.75527 | 0.83164 |

|                        |            |         |         |
|------------------------|------------|---------|---------|
| CAR 11:0               | 0.055348   | 0.77144 | 0.83344 |
| PC(O-34:1)/PE(O-37:1)  | 0.054734   | 0.77391 | 0.83344 |
| PC(32:1)/PE(35:1)      | -0.051512  | 0.7869  | 0.83822 |
| SM 36:2;O2/EPC 39:2;O2 | 0.041395   | 0.82806 | 0.87258 |
| SM 41:2;O2             | 0.037244   | 0.84509 | 0.88105 |
| SM 42:2;O2             | 0.028796   | 0.87994 | 0.90772 |
| PI(38:4)               | 0.0059784  | 0.97499 | 0.98892 |
| Cer 42:1;O2            | -0.0050589 | 0.97883 | 0.98892 |
| SM 41:1;O2             | -0.0024445 | 0.98977 | 0.98977 |

**Table S7.** Correlation analysis between the clinical parameter ALSFR-S and ALS patients' serum metabolites detected by NMR and HRMS. The table shows the correlation coefficient (corr.value) calculated by Person distance and the univariate statistical validation carried out using p-value and False discovery rate (FDR). Metabolites with p-value <0.05, correlation index  $\geq \pm 70$  and FDR <1 are considering correlating with ALSFR-S parameter.

| ALSFR-S/NMR metabolites correlation | Corr.value | p-value    | FDR        |
|-------------------------------------|------------|------------|------------|
| L-Tyrosine                          | 0.82867    | 1,56E-05   | 2,19E-03   |
| 1-Methylhistidine                   | 0.7837     | 3,03E-03   | 3,18E-02   |
| L-Histidine                         | -0.72426   | 6,05E-02   | 4,39E-01   |
| L-Glutamine                         | 0.72344    | 6,27E-02   | 4,39E-01   |
| L-Alanine                           | 0.7068     | 1,27E-01   | 7,60E-01   |
| Betaine                             | 0.69198    | 2,28E-01   | 0.00011957 |
| L-Carnitine                         | 0.65582    | 8,34E-01   | 0.00038939 |
| Acetoacetate                        | 0.64071    | 0.00013665 | 0.00057391 |
| L-Arginine                          | 0.62769    | 0.00020483 | 0.00078207 |
| L-Valine                            | 0.57459    | 0.00089746 | 0.0031411  |
| L-Glutamic acid                     | 0.56481    | 0.001147   | 0.0037058  |
| L-Asparagine                        | -0.55928   | 0.0013136  | 0.0039408  |
| Citric acid                         | 0.53845    | 0.0021436  | 0.0058707  |
| Lysine                              | 0.53659    | 0.0022364  | 0.0058707  |
| L-Aspartic acid                     | 0.53375    | 0.0023841  | 0.0058901  |
| L-Phenylalanine                     | 0.50264    | 0.004643   | 0.010834   |
| L-Isoleucine                        | -0.49251   | 0.0056949  | 0.012589   |
| Pyruvic acid                        | 0.48848    | 0.0061662  | 0.012949   |
| Hypoxanthine                        | 0.41339    | 0.023169   | 0.043549   |
| Glycine                             | 0.41257    | 0.023469   | 0.043549   |
| L-Threonine                         | 0.41155    | 0.023848   | 0.043549   |
| Succinic acid                       | -0.35986   | 0.050786   | 0.088875   |
| Formic acid                         | 0.35215    | 0.056328   | 0.094631   |

|                                                   |                   |                |            |
|---------------------------------------------------|-------------------|----------------|------------|
| 3-Hydroxybutyric acid                             | -0.33927          | 0.066637       | 0.10764    |
| D-Glucose                                         | -0.3272           | 0.077571       | 0.12067    |
| Acetone                                           | 0.30914           | 0.096454       | 0.14468    |
| Creatinine                                        | 0.28929           | 0.12101        | 0.17526    |
| L-Lactic acid                                     | -0.28134          | 0.13204        | 0.18486    |
| L-Proline                                         | 0.26255           | 0.16101        | 0.21815    |
| Acetic acid                                       | 0.24006           | 0.20133        | 0.26424    |
| L-Serine                                          | -0.22669          | 0.22835        | 0.29062    |
| L-Leucine                                         | 0.21991           | 0.24294        | 0.3001     |
| Methionine                                        | 0.18497           | 0.3278         | 0.39335    |
| 2-Hydroxybutyrate                                 | -0.15512          | 0.41309        | 0.48194    |
| L-Tryptophan                                      | 0.13046           | 0.49199        | 0.55847    |
| Malonic acid                                      | -0.11984          | 0.52819        | 0.58379    |
| Creatine                                          | 0.11334           | 0.55093        | 0.59331    |
| Ornithine                                         | 0.10216           | 0.59113        | 0.62069    |
| Isobutyric acid                                   | 0.087394          | 0.64608        | 0.66183    |
| Choline                                           | 0.02829           | 0.88203        | 0.88203    |
| <b>ALSFR-S/HRMS polar-metabolites correlation</b> | <b>Corr.value</b> | <b>p-value</b> | <b>FDR</b> |
| PC(34:1)                                          | 0.44135           | 0.014627       | 0.15476    |
| Uric acid                                         | -0.43182          | 0.01718        | 0.15476    |
| Dehydroepiandrosterone sulfate                    | -0.43073          | 0.017495       | 0.15476    |
| L-isoleucyl-L-proline                             | -0.42711          | 0.018571       | 0.15476    |
| LPC(20:3)                                         | 0.35765           | 0.052327       | 0.33513    |
| Creatinine                                        | -0.35584          | 0.053621       | 0.33513    |
| L-Isoleucine                                      | -0.33027          | 0.074667       | 0.41482    |
| Creatine                                          | 0.27134           | 0.14694        | 0.70556    |
| PC(36:3)                                          | -0.25058          | 0.18169        | 0.70556    |
| 3-(3-45-Trimethoxyphenyl)propanoic acid           | 0.24108           | 0.19937        | 0.70556    |
| L-Methionine                                      | 0.23037           | 0.22067        | 0.70556    |
| 5-Acetylamino-6-formylamino-3-methyluracil        | 0.22867           | 0.22419        | 0.70556    |
| Indoxyl sulfate                                   | -0.22774          | 0.22614        | 0.70556    |
| 4-Hydroxyestrone sulfate                          | -0.21907          | 0.24478        | 0.70556    |
| SM(34:1)                                          | 0.19602           | 0.29921        | 0.70556    |
| Palmitoleic acid                                  | -0.19303          | 0.30678        | 0.70556    |
| Betaine                                           | -0.19281          | 0.30734        | 0.70556    |
| LPC(18:2)                                         | -0.19237          | 0.30848        | 0.70556    |
| LPC(18:1)                                         | 0.1885            | 0.3185         | 0.70556    |
| L-Arginine                                        | 0.18528           | 0.32699        | 0.70556    |
| L-Tryptophan                                      | 0.18461           | 0.32875        | 0.70556    |
| Stearoylcarnitine                                 | -0.18093          | 0.33867        | 0.70556    |
| L-Histidine                                       | -0.17338          | 0.35953        | 0.71906    |
| LPC(16:1)                                         | 0.16194           | 0.39259        | 0.74606    |
| Oleic acid                                        | -0.15849          | 0.40287        | 0.74606    |
| LPC(16:0)                                         | 0.14322           | 0.45024        | 0.804      |

|                                                    |                   |                |            |
|----------------------------------------------------|-------------------|----------------|------------|
| L-Phenylalanine                                    | 0.11748           | 0.5364         | 0.84022    |
| L-Octanoylcarnitine                                | 0.11716           | 0.5375         | 0.84022    |
| L-Carnitine                                        | -0.11062          | 0.5606         | 0.84022    |
| Decanoylcarnitine                                  | 0.10584           | 0.57777        | 0.84022    |
| PC(36:2)                                           | -0.10294          | 0.58828        | 0.84022    |
| L-Lysine                                           | -0.09893          | 0.60298        | 0.84022    |
| Androsterone sulfate                               | -0.094915         | 0.61784        | 0.84022    |
| LPC(18:0)                                          | 0.093616          | 0.62268        | 0.84022    |
| 9-Decenoylcarnitine                                | -0.089618         | 0.63768        | 0.84022    |
| PC(34:2)                                           | -0.089382         | 0.63857        | 0.84022    |
| L-Tyrosine                                         | 0.079668          | 0.67559        | 0.86614    |
| Paraxanthine                                       | 0.070872          | 0.70978        | 0.87131    |
| L-Glutamine                                        | 0.067332          | 0.7237         | 0.87131    |
| D-Glucose                                          | -0.064775         | 0.7338         | 0.87131    |
| p-Cresol sulfate                                   | 0.060394          | 0.75123        | 0.87131    |
| Citric acid                                        | -0.056513         | 0.76676        | 0.87131    |
| L-Fucose                                           | 0.041534          | 0.82749        | 0.91944    |
| 3-Methyl-2-oxovaleric acid                         | -0.035412         | 0.85262        | 0.92676    |
| L-Proline                                          | 0.026918          | 0.88772        | 0.94438    |
| L-Acetylcarnitine                                  | 0.018708          | 0.92183        | 0.95194    |
| Linoleic acid                                      | 0.016053          | 0.9329         | 0.95194    |
| Phenylalanylphenylalanine                          | 0.0001226         | 0.99949        | 0.99949    |
| <b>ALSFR-S/HRMS apolar-metabolites correlation</b> | <b>Corr.value</b> | <b>p-value</b> | <b>FDR</b> |
| TG(50:3)                                           | 0.56605           | 0.0011124      | 0.024807   |
| ST 24:2;O4                                         | 0.55956           | 0.0013045      | 0.024807   |
| TG(52:3)                                           | 0.5471            | 0.0017559      | 0.024807   |
| TG(52:2)                                           | 0.54458           | 0.001862       | 0.024807   |
| PC(O-16:0)/LPE(19:0)                               | 0.54003           | 0.0020681      | 0.024807   |
| SM 35:1;O2/EPC 38:1;O2                             | 0.53498           | 0.0023193      | 0.024807   |
| 9Z-12Z-octadecadienamide                           | 0.53206           | 0.002476       | 0.024807   |
| PC(38:5)/PE(41:5)                                  | 0.52257           | 0.0030511      | 0.024807   |
| PC(35:1)/PE(38:1)                                  | 0.52021           | 0.0032112      | 0.024807   |
| PI(29:1)                                           | 0.52006           | 0.0032218      | 0.024807   |
| TG(48:1)                                           | 0.51724           | 0.0034227      | 0.024807   |
| TG(52:5)                                           | 0.51298           | 0.0037464      | 0.024807   |
| PC(O-36:2)/PE(P-39:1)                              | 0.51194           | 0.003829       | 0.024807   |
| TG(54:5)                                           | 0.50926           | 0.0040502      | 0.024807   |
| PC(35:4)/PE(38:4)                                  | -0.47718          | 0.0076681      | 0.042709   |
| PC(O-32:1)/PE(O-35:1)                              | 0.47598           | 0.0078446      | 0.042709   |
| TG(50:2)                                           | 0.45568           | 0.011387       | 0.057769   |
| PC(36:1)/PE(39:1)                                  | 0.45373           | 0.01179        | 0.057769   |
| CE(18:3)                                           | -0.44565          | 0.013582       | 0.062573   |
| SM 42:1;O2                                         | 0.44371           | 0.014047       | 0.062573   |
| PE(O-38:5)                                         | 0.43702           | 0.015745       | 0.067088   |

|                        |          |          |          |
|------------------------|----------|----------|----------|
| PC(O-18:0)/LPC(18:0)   | 0.43371  | 0.016645 | 0.067968 |
| PC(40:5)               | 0.41652  | 0.022043 | 0.083775 |
| TG(50:4)               | 0.41601  | 0.022226 | 0.083775 |
| PC(40:4)/PE(43:4)      | 0.41153  | 0.023857 | 0.086593 |
| TG(48:2)               | 0.40736  | 0.025461 | 0.089113 |
| TG(52:4)               | 0.40127  | 0.027967 | 0.09024  |
| PI(27:1)               | 0.40026  | 0.028399 | 0.09024  |
| TG(63:4)               | 0.39993  | 0.028545 | 0.09024  |
| LPC(16:1)              | -0.39597 | 0.030306 | 0.090339 |
| SM 34:1;O2/EPC 37:1;O2 | 0.39423  | 0.031106 | 0.090339 |
| PC(36:2)/PE(39:2)      | 0.39301  | 0.031681 | 0.090339 |
| PC(38:4)/PE(41:4)      | 0.38978  | 0.033235 | 0.090339 |
| PC(37:4)/PE(40:4)      | 0.38976  | 0.033246 | 0.090339 |
| 3-Deoxyvitamin D3      | 0.38653  | 0.034861 | 0.090339 |
| PC(34:1)/PE(37:1)      | 0.3862   | 0.035029 | 0.090339 |
| PC(38:3)/PE(41:3)      | 0.3759   | 0.040642 | 0.10026  |
| SM 40:1;O2             | 0.37457  | 0.041416 | 0.10026  |
| PC(O-36:4)             | 0.37367  | 0.041946 | 0.10026  |
| CE(18:2)               | -0.36753 | 0.045711 | 0.1062   |
| TG(54:4)               | 0.36013  | 0.050603 | 0.11083  |
| CE (19:0)              | -0.35971 | 0.050889 | 0.11083  |
| PC(35:3)/PE(38:3)      | -0.35658 | 0.053091 | 0.11311  |
| MG(18:0)               | -0.34324 | 0.063316 | 0.13202  |
| CAR 11:0               | 0.32682  | 0.077935 | 0.15621  |
| TG(66:10)              | 0.32513  | 0.07958  | 0.15621  |
| PC(35:2)/PE(38:2)      | -0.32501 | 0.079699 | 0.15621  |
| PC(38:6)/PE(41:6)      | 0.32189  | 0.082803 | 0.15911  |
| PC(O-38:4)             | 0.31611  | 0.08879  | 0.16734  |
| CE(20:3)               | 0.31304  | 0.092114 | 0.17032  |
| PC(36:4)/PE(39:4)      | 0.31053  | 0.094887 | 0.1722   |
| CE(16:0)               | -0.30048 | 0.10666  | 0.18894  |
| TG(51:2)               | 0.29941  | 0.10797  | 0.18894  |
| PC(O-36:3)             | 0.29652  | 0.11158  | 0.19184  |
| LPC(20:4)              | -0.28081 | 0.13281  | 0.2244   |
| PC(O-36:5)             | 0.27919  | 0.13515  | 0.22449  |
| TG(56:6)               | 0.27001  | 0.14901  | 0.24339  |
| SM 40:2;O2             | 0.25032  | 0.18216  | 0.29265  |
| SM 41:2;O2             | 0.23891  | 0.20357  | 0.32177  |
| PC(38:2)/PE(41:2)      | 0.23179  | 0.21777  | 0.33875  |
| SM 42:3;O2             | 0.22875  | 0.22403  | 0.34305  |
| Cer 42:1;O2            | 0.21603  | 0.25156  | 0.37928  |
| CE(18:1)               | -0.21329 | 0.25778  | 0.38276  |
| TG(50:1)               | 0.20366  | 0.28038  | 0.40496  |
| PC(30:0)/PE(33:0)      | 0.20341  | 0.28099  | 0.40496  |

|                        |           |         |         |
|------------------------|-----------|---------|---------|
| PC(33:1)/PE(36:1)      | -0.19635  | 0.29838 | 0.42125 |
| PC(O-44:5)             | 0.19535   | 0.30089 | 0.42125 |
| PC(O-34:1)/PE(O-37:1)  | 0.18465   | 0.32864 | 0.45362 |
| PC(P-40:6)             | 0.18077   | 0.33909 | 0.46154 |
| PC(O-40:5)             | 0.17581   | 0.35273 | 0.47353 |
| SM 41:1;O2             | 0.16763   | 0.37593 | 0.48825 |
| SM 36:0;O2             | 0.16721   | 0.37716 | 0.48825 |
| PI(38:4)               | -0.16669  | 0.37865 | 0.48825 |
| PC(34:2)/PE(37:2)      | -0.16154  | 0.39375 | 0.50114 |
| CE(16:1)               | 0.14887   | 0.43236 | 0.53935 |
| PC(O-38:5)             | 0.1481    | 0.43479 | 0.53935 |
| Cer 42:0;O3            | 0.14462   | 0.44576 | 0.54604 |
| SM 36:2;O2/EPC 39:2;O2 | 0.14288   | 0.45132 | 0.54604 |
| PC(32:2)/PE(35:2)      | -0.13939  | 0.46257 | 0.55106 |
| TG(63:7)               | 0.13509   | 0.47661 | 0.55106 |
| SM 42:2;O2             | -0.13473  | 0.47779 | 0.55106 |
| PC(O-38:6)             | 0.13468   | 0.47796 | 0.55106 |
| SM 32:1;O2/EPC 35:1;O2 | -0.11545  | 0.54352 | 0.61936 |
| SM 34:2;O2/EPC 37:2;O2 | 0.083699  | 0.66013 | 0.73575 |
| PC(40:6)/PE(43:6)      | 0.083557  | 0.66067 | 0.73575 |
| PC(32:1)/PE(35:1)      | 0.071262  | 0.70825 | 0.77987 |
| LPC(18:2)              | 0.063442  | 0.73909 | 0.80479 |
| PC(O-40:6)             | -0.051093 | 0.7886  | 0.84926 |
| FA 22:1;O2             | 0.024127  | 0.8993  | 0.95184 |
| PC(32:0)/PE(35:0)      | -0.023169 | 0.90327 | 0.95184 |
| SM 38:1;O2             | -0.020009 | 0.91642 | 0.95541 |
| PC(36:3)/PE(39:3)      | 0.016959  | 0.92912 | 0.95847 |
| CE(20:4)               | 0.0066675 | 0.97211 | 0.98919 |
| SM 38:2;O2             | 0.0049966 | 0.97909 | 0.98919 |
| FA 26:5;O2             | 0.0010099 | 0.99577 | 0.99577 |

**Table S8.** Validation of the multivariate O-PLS-DA model related to NMR spectroscopy and HRMS analysis on *early* and *advanced* male ALS patients' serum extracts.

| NMR SPECTROSCOPY           |      |      |      |
|----------------------------|------|------|------|
|                            | p1   | o1   | o2   |
| R2X                        | 0.16 | 0.16 | 0.15 |
| R2Y                        | 0.83 | 0.15 | 0.20 |
| Q2                         | 0.66 | 0.23 | 0.14 |
| HRMS SPECTROSCOPY          |      |      |      |
| <i>Polar serum extract</i> |      |      |      |
|                            | p1   | o1   | o2   |
| R2X                        | 0.19 | 0.26 | 0.12 |

|                             |      |      |      |
|-----------------------------|------|------|------|
| R2Y                         | 0.78 | 0.17 | 0.03 |
| Q2                          | 0.69 | 0.19 | 0.07 |
| <i>Apolar serum extract</i> |      |      |      |
|                             | p1   | o1   | o2   |
| R2X                         | 0.05 | 0.42 | 0.12 |
| R2Y                         | 0.74 | 0.15 | 0.09 |
| Q2                          | 0.10 | 0.47 | 0.35 |



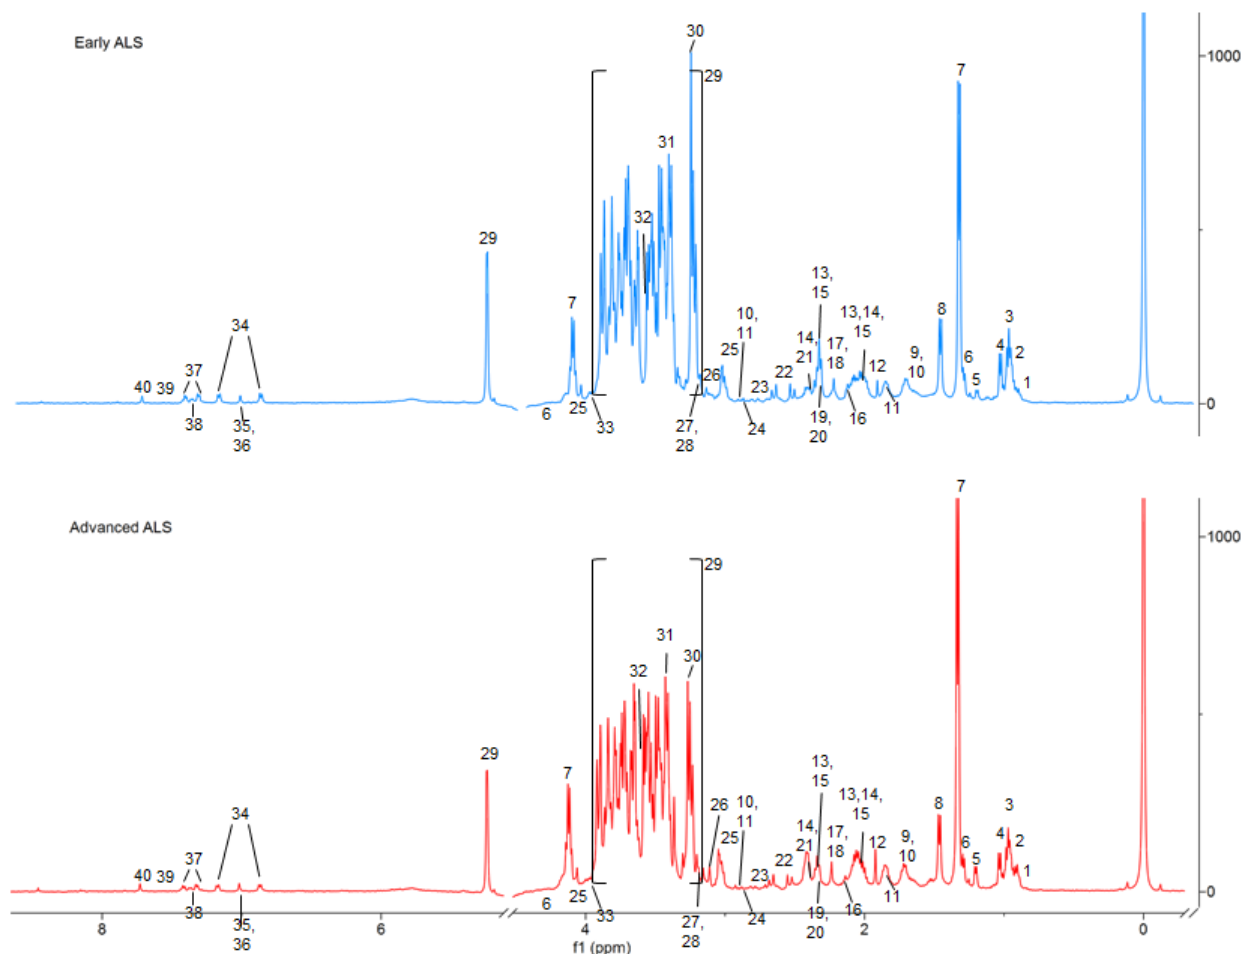

**Figure S1.** 1D-NOESY  $^1\text{H}$  nuclear magnetic resonance spectra of human sera samples from: early ALS patients (blue) and advanced ALS patient (red). The spectra are acquired at 600 MHz and  $T = 310\text{ K}$ .

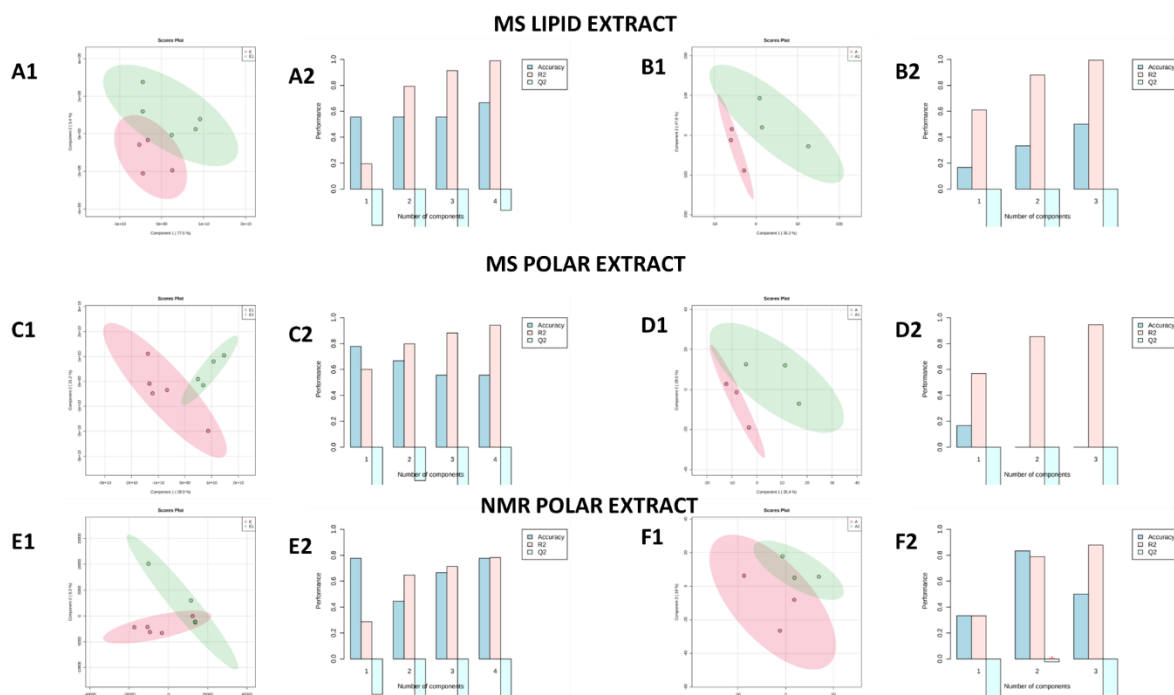

**Figure S2.** PLS-DA score plot for serum polar(A1-B1) and lipid extracts (C1-D1) obtained by mass spectrometry and serum polar extracts obtained by  $^1\text{H}$ -NMR spectroscopy (E1-F1). The dataset used corresponds to *early* (A1-C1-E1) and *advanced* subset (B1-D1-F1). Histograms (A2-F2) are related to cross-validation indices R2, Q2 and accuracy.

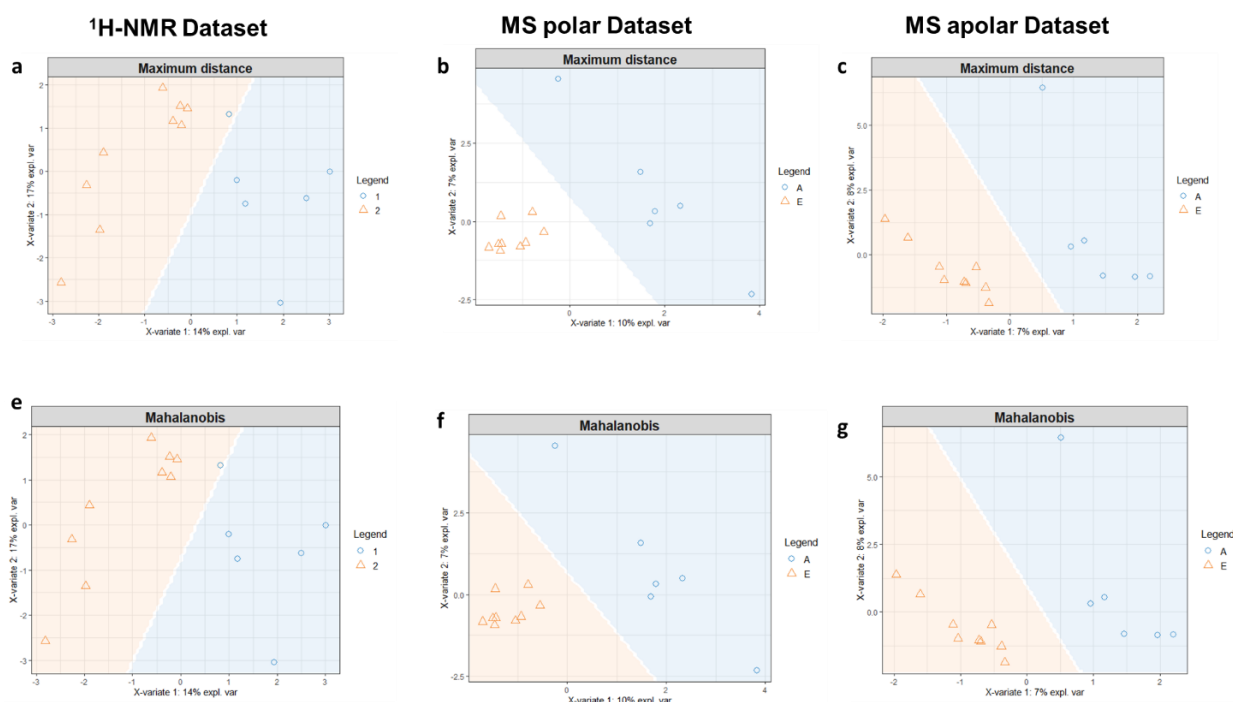

**Figure S3.** Sample prediction area plot carried out using Maximum distance (a,b,c) and Mahalanobis (e,f,g) showing the distribution of samples in validation area.

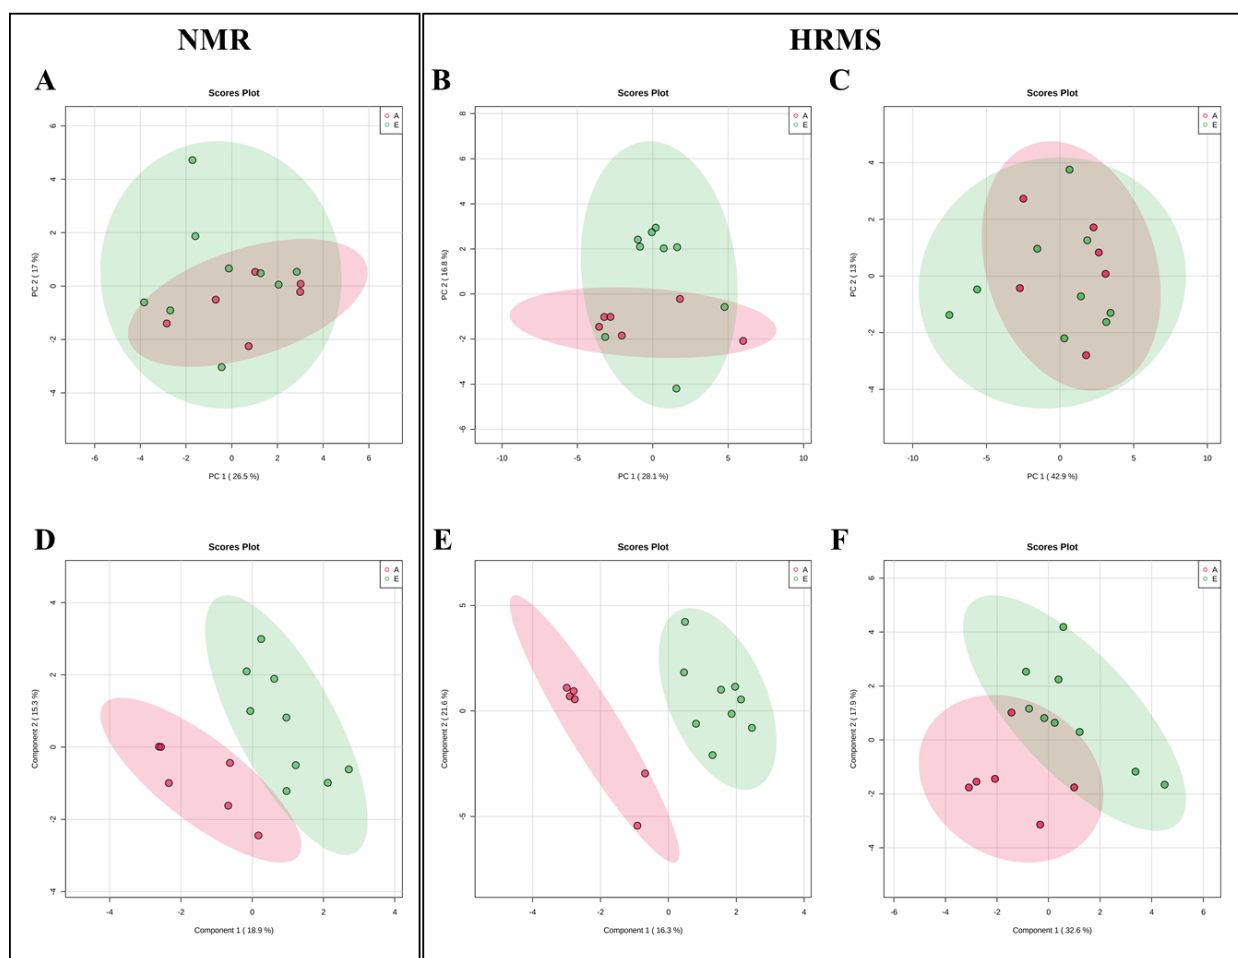

**Figure S4.** PCA and PLS-DA score plot (A-D) for  $^1\text{H}$  NMR data collected in 1D-NOESY spectra acquired at 600 MHz. Data represent the sera from 9 ALS *early* patients (green) and 6 ALS *advanced* patients (red). PCA and PLS-DA score scatter plot for the HRMS data collected acquired in ESI(+) and (-). Data are relative to polar and (B-E) and apolar (C-F) serum extract of 9 ALS *early* patients (green) compared to 6 *advanced* patients (red).

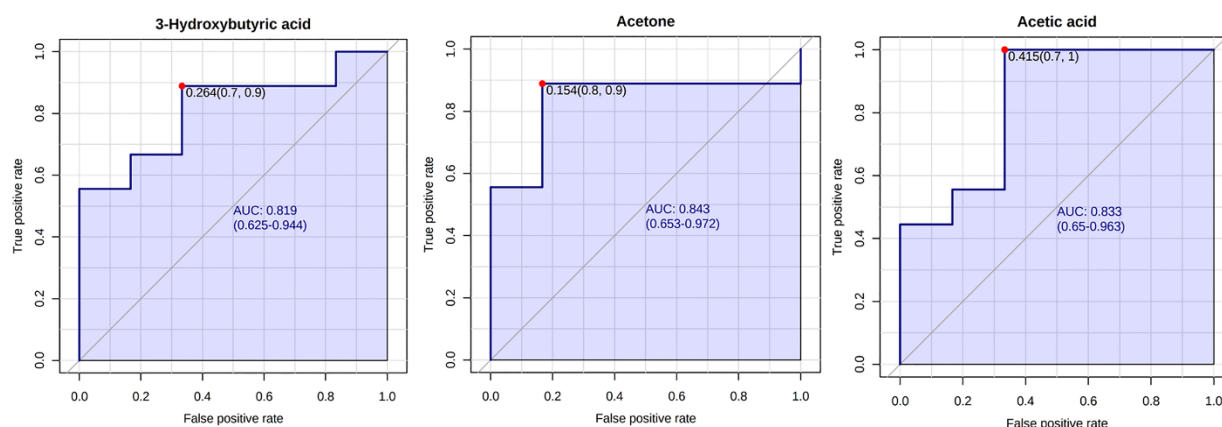

**Figure S5.** ROC curve of biomarker identified using serum polar extract by NMR spectroscopy. The sensitivity is on the y-axis, and the specificity is on the x-axis. AUC is in blue.

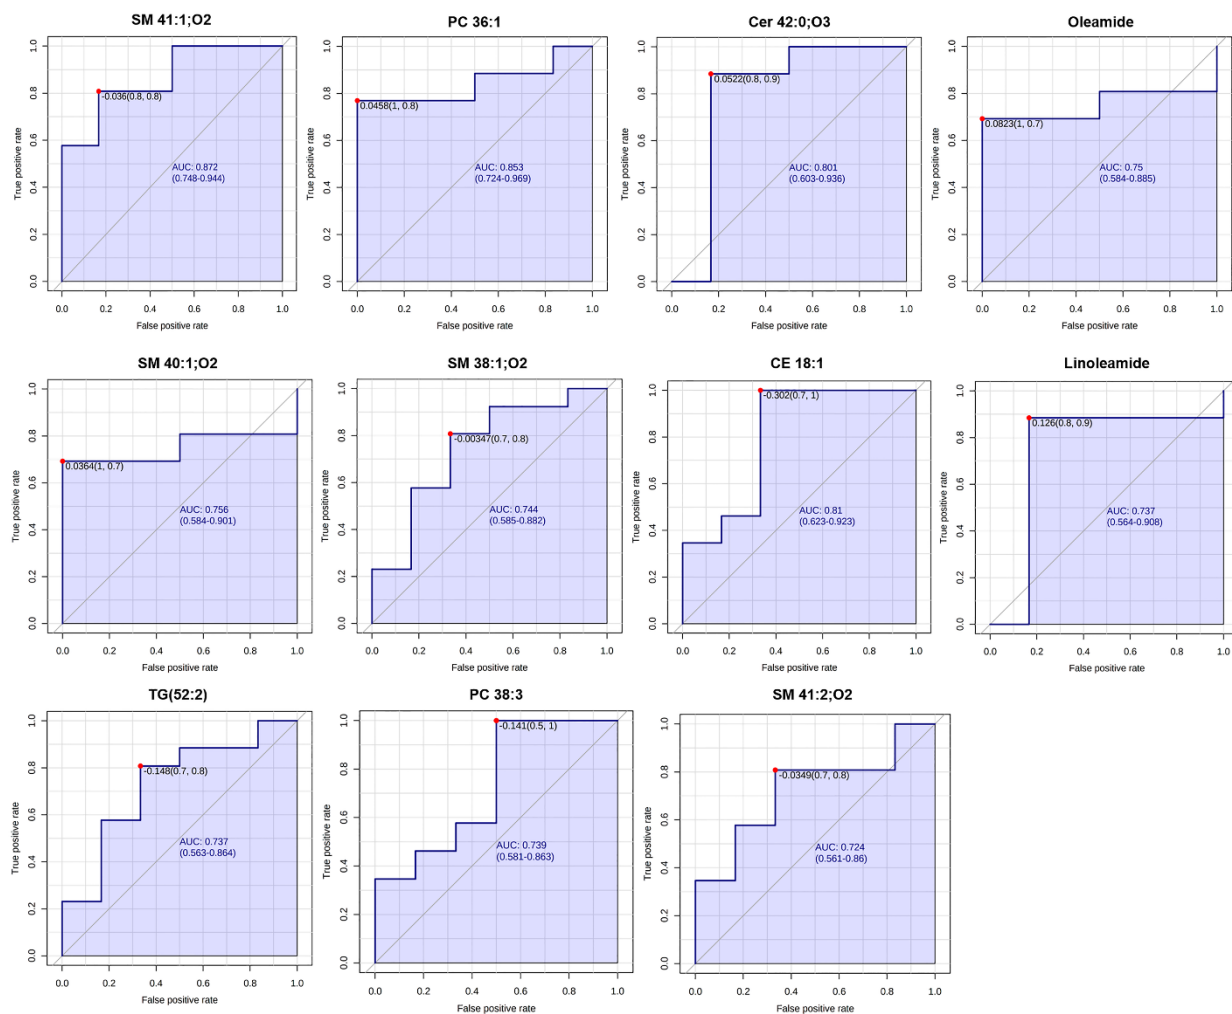

**Figure S6.** ROC curve of biomarker identified using serum apolar extract by HRMS spectroscopy. The sensitivity is on the y-axis, and the specificity is on the x-axis. AUC is in blue.

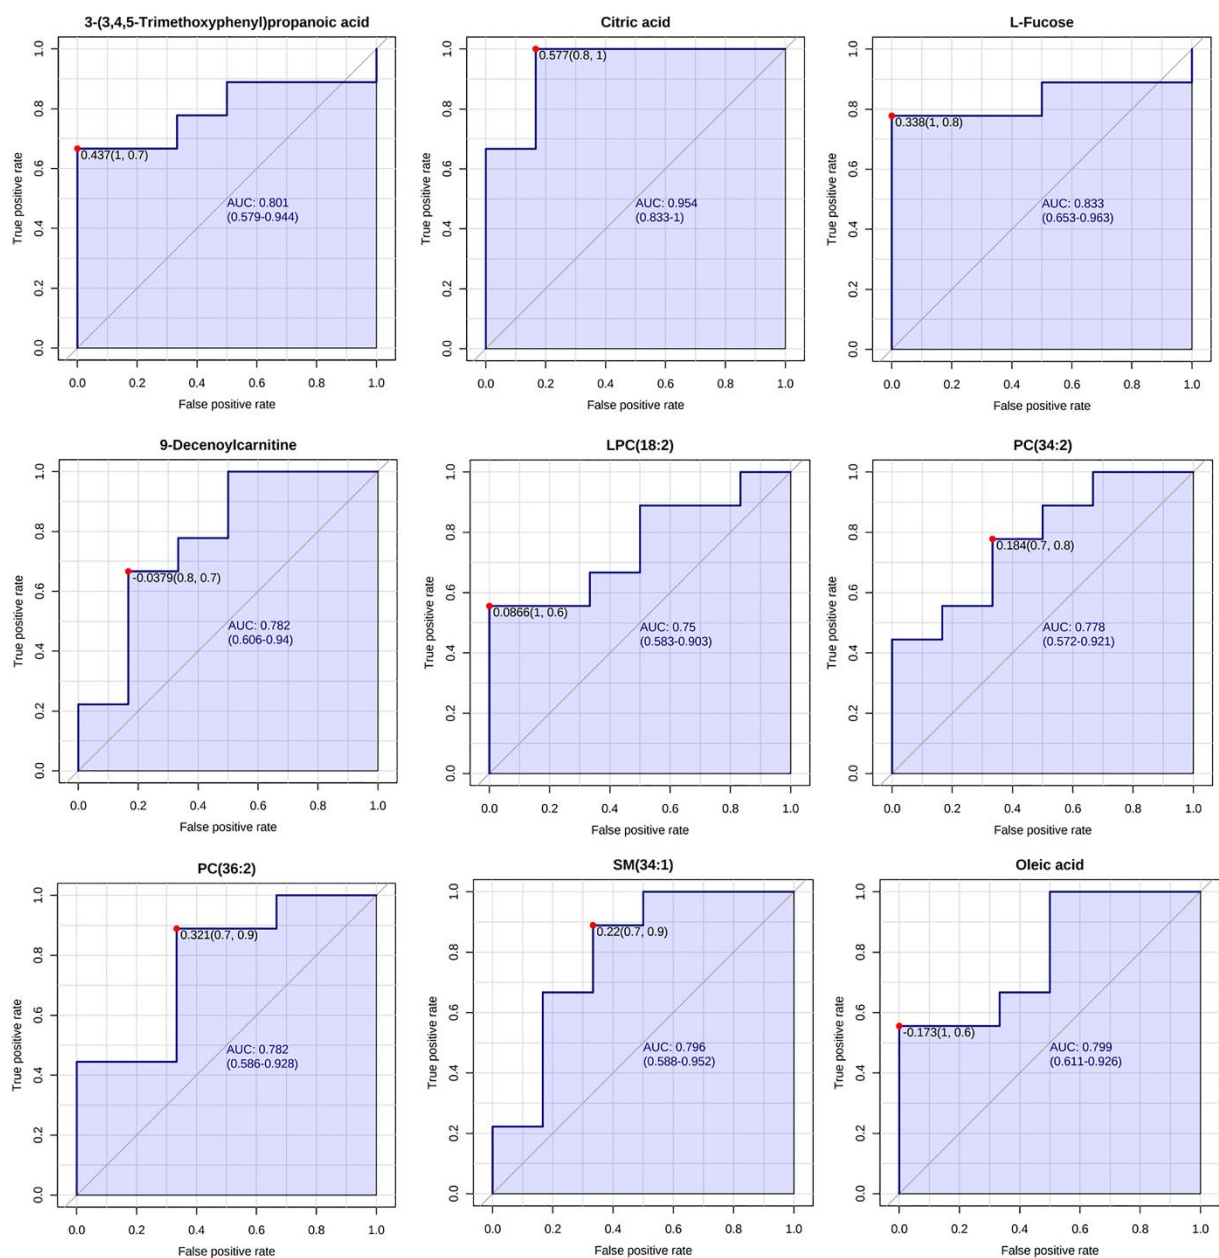

**Figure S7.** ROC curve of biomarker identified using serum polar extract by HRMS spectroscopy. The sensitivity is on the y-axis, and the specificity is on the x-axis. AUC is in blue

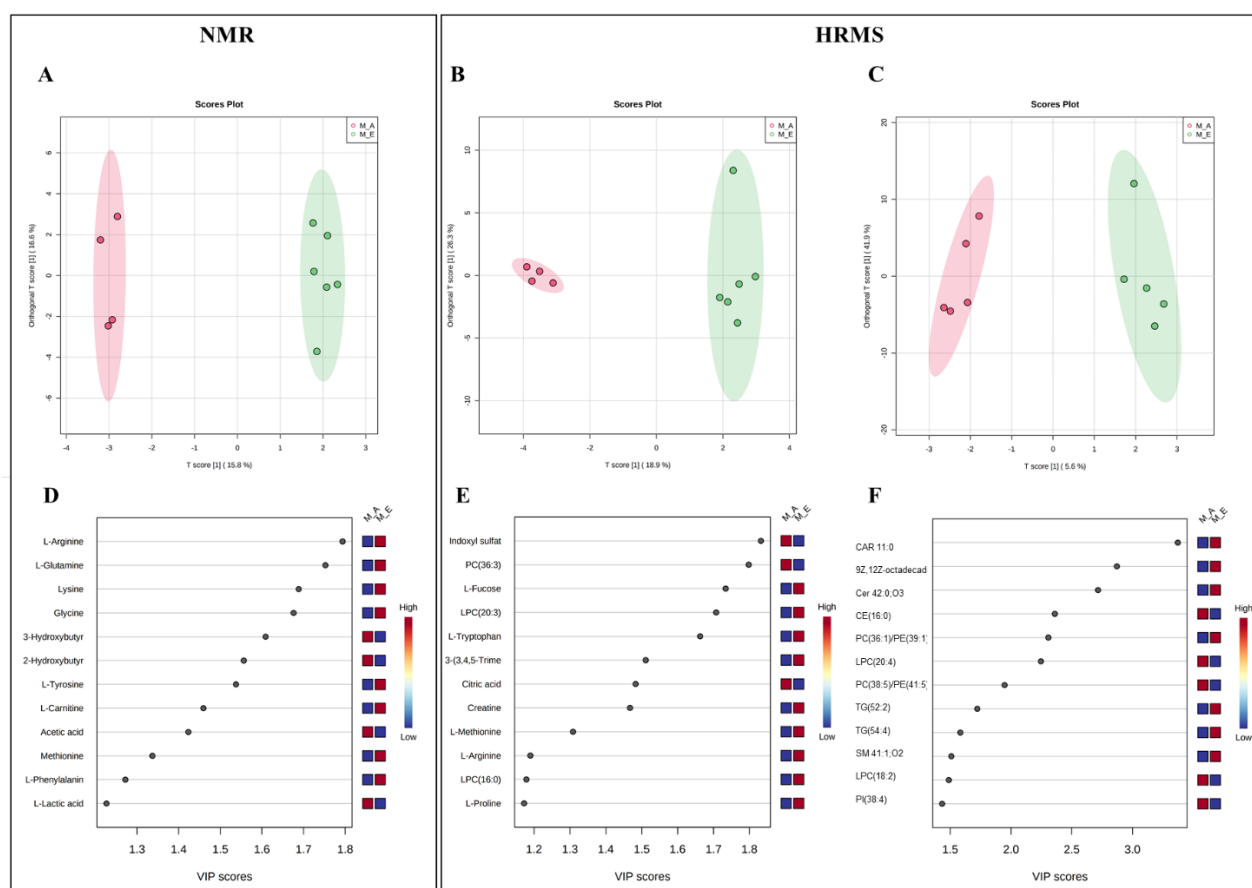

**Figure S8.** OPLS-DA score plot and VIP graph (A-D) for  $^1\text{H}$  NMR data collected in 1D-NOESY spectra acquired at 600 MHz. Data represent the sera from 6 male ALS *early* patients (green) and 4 male ALS *advanced* patients (red). O-PLS-DA score scatter plot and VIP graph for the HRMS data collected acquired in ESI(+) and (-). Data are relative to polar and (B-E) and apolar (C-F) serum extract of 6 male ALS *early* patients (green) compared to 4 male *advanced* patients (red).
